# Supplementary material for: Prospective genomically guided identification of “early/evolving” and “undersampled” IDH-wildtype glioblastoma leads to improved clinical outcomes
Source: PubMed Central journal article supplement — Neuro Oncol. 2022 Apr 8;24(10):1749–62. doi: 10.1093/neuonc/noac089 (PMC9527525; doi:10.1093/neuonc/noac089), 2022-04-08
Supplement: noac089_suppl_supplementary_figure_s1.pdf [file noac089_suppl_supplementary_figure_s1.pdf]

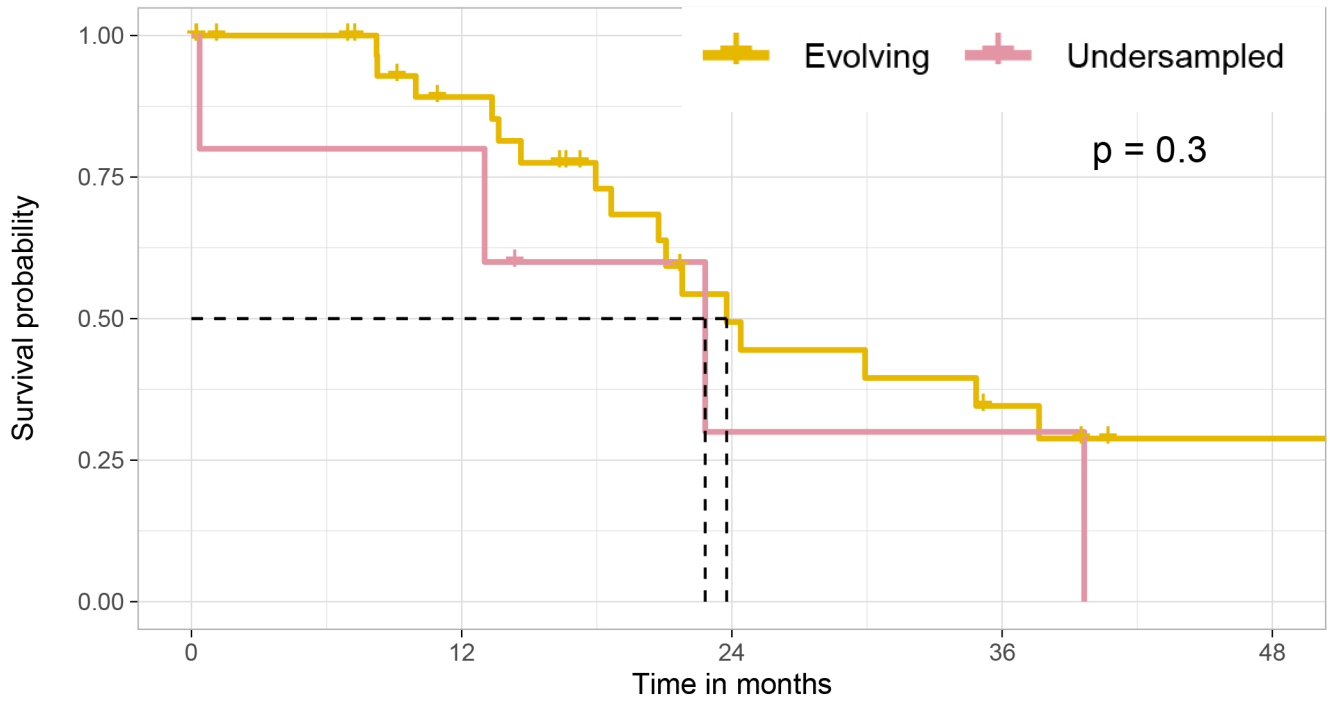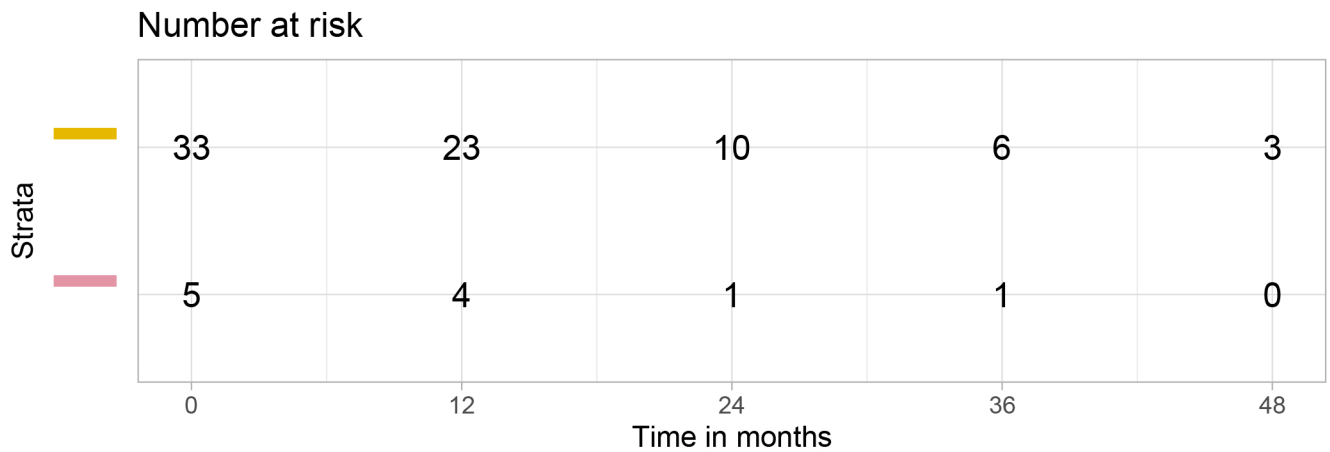

**Supplementary Figure 1.** Kaplan-Meier plot of overall survival stratified by designation as “early/evolving” versus “undersampled” disease.
